# Supplementary material for: A sustainable single-component “Silk nacre”
Source: PubMed Central journal article supplement — Sci Adv. 2022 May 13;8(19):eabo0946. doi: 10.1126/sciadv.abo0946 (PMC9106289; doi:10.1126/sciadv.abo0946), 2022-05-13
Supplement: sciadv.abo0946_sm.pdf [file sciadv.abo0946_sm.pdf]

Supplementary Materials for  
**A sustainable single-component “Silk nacre”**

Zongpu Xu, Mingrui Wu, Weiwei Gao, Hao Bai\*

\*Corresponding author. Email: [hbai@zju.edu.cn](mailto:hbai@zju.edu.cn)

Published 13 May 2022, *Sci. Adv.* **8**, eabo0946 (2022)  
DOI: [10.1126/sciadv.abo0946](https://doi.org/10.1126/sciadv.abo0946)

**The PDF file includes:**

Figs. S1 to S8  
Legend for movie S1

**Other Supplementary Material for this manuscript includes the following:**

Movie S1

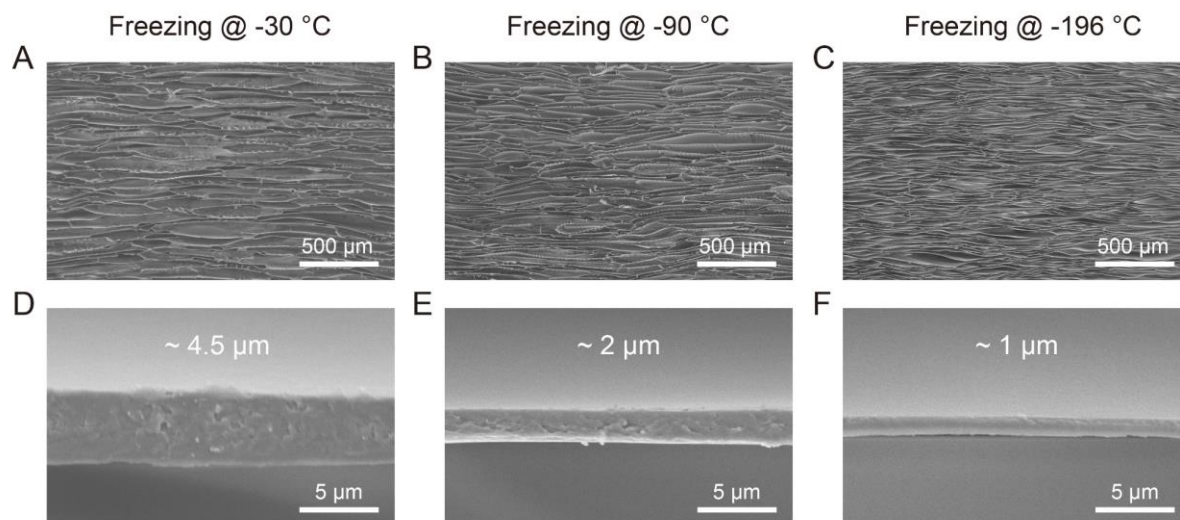

**Fig. S1. SEM images of the cross sections of silk aerogels prepared at different cooling temperatures by keeping the copper finger at -30 °C, -90 °C, and -196 °C. (A to C) The cross sections of all samples show long-range aligned lamellar structures. (D to F) Magnified images show that the thicknesses of silk laminae decrease with the reduction in temperature.**

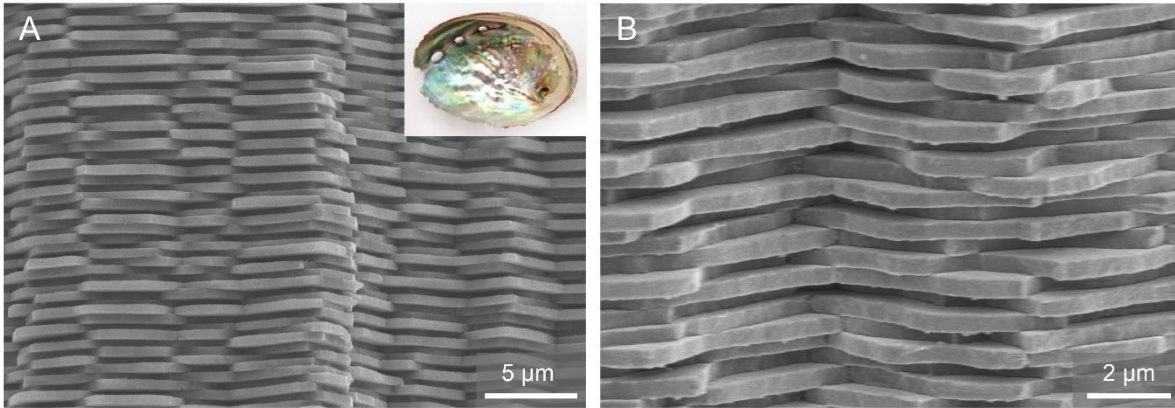

**Fig. S2. The morphology and microstructure of natural nacre.** (A) SEM image of the cross section of natural nacre and inset is an optical photograph of the nacre formed by an abalone *Haliotis discus hannai*. (B) The magnified SEM image shows nacre's typical lamellar structures.

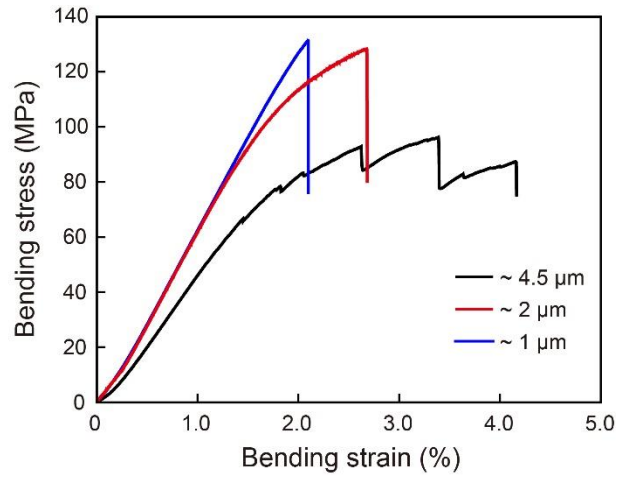

**Fig. S3. Stress-strain curves of the “Silk nacre” with different thickness of the laminae. The breaking strength of the “Silk nacre” decreased with the increasing thickness of the silk laminae.**

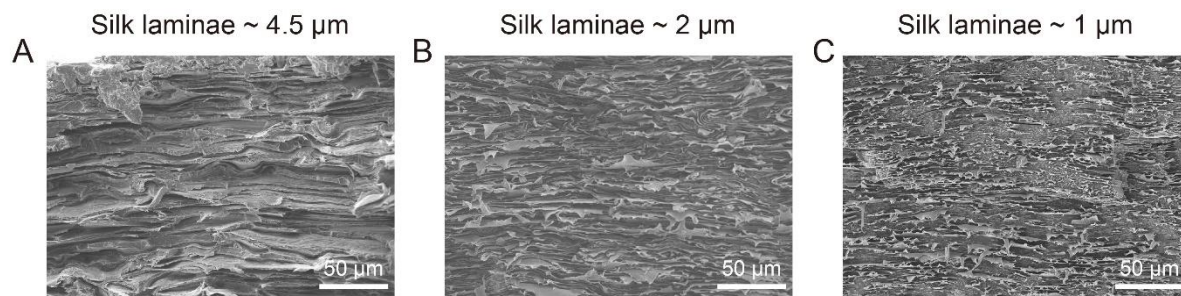

**Fig. S4. SEM images showing the fracture cross-sections of the “Silk nacre” with different thickness of the laminae. (A-C) The thickness of silk laminae is ~ 4.5 μm, ~ 2 μm, and ~ 1 μm, respectively.**

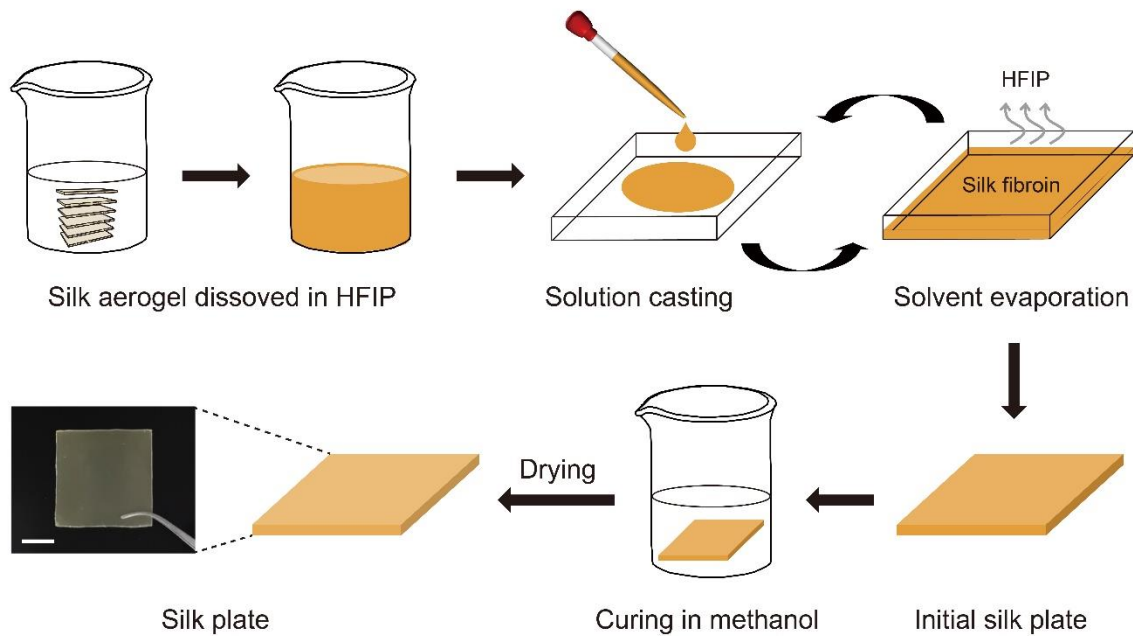

**Fig. S5. Schematic diagram of the preparation procedure of homogeneous silk plate.** The processes include dissolution of silk aerogel in HFIP, alternate silk-HFIP solution casting and solvent evaporation of HFIP, as well as curing in methanol and drying. The optical photograph shows the as-prepared silk plate, and the scale bar is 1 cm.

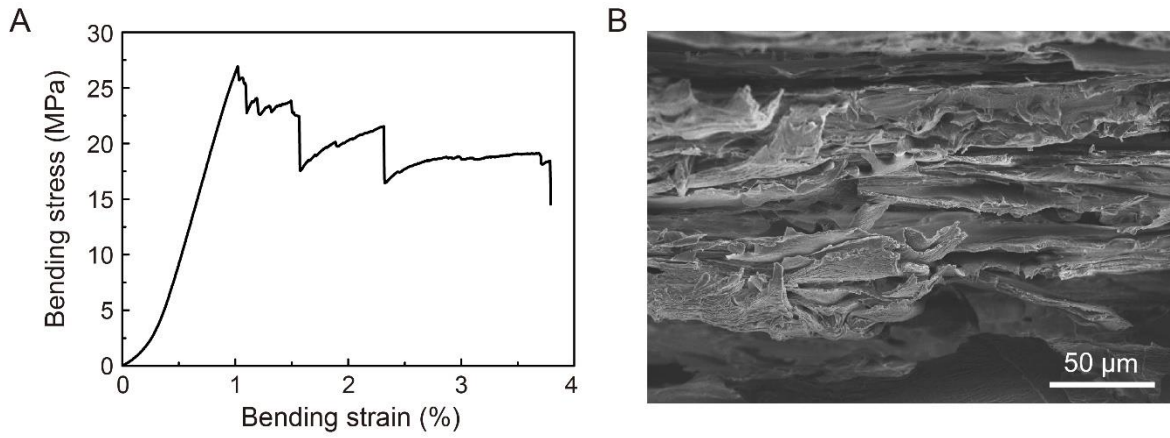

**Fig. S6. The mechanical property and fracture morphology of the “Silk nacre” with weak interfaces.** (A) Stress-strain curve; (B) SEM image of the fracture surface. This material is prepared by directly pressing the freeze-dried silk aerogel without water vapor annealing.

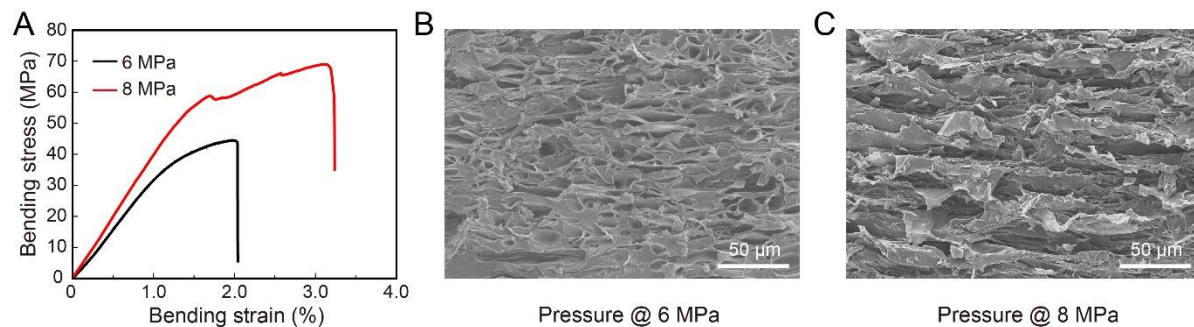

**Fig. S7. The mechanical property and fracture morphology of the “Silk nacre” prepared at various compressive pressures. (A) Stress-strain curve; (B, C) The SEM image of the fracture surfaces show the reduction in structural densification as the interlamellar voids are observed.**



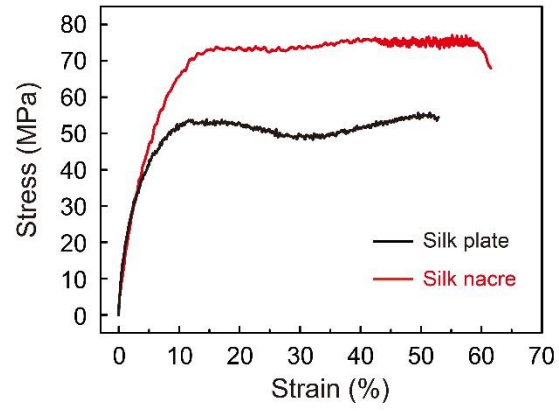

**Fig. S8.** Stress-strain curves from split Hopkinson pressure bar (SHPB) tests indicate the better impact resistance of the “Silk nacre” than silk plate at high compression strain rate ( $10,000 \text{ s}^{-1}$ ).

**Movie S1. The falling ball impact tests show the better impact resistance of the “Silk nacre” than silk plate.**
